# Supplementary material
Source: MDPI journal article supplement (https://www.mdpi.com/2072-4292/7/11/15318)
Supplement: s1 [file s1]

Supplementary Information

Why the subsequences for likelihood calculation must start from the first observation of a year?

In this study, we wish to calculate the model likelihood of a subsequence , where the *t*th observation in the *n*th year is denoted by . Since the trained HSMM is noncyclic (the terminal state cannot convert to any other states), it is unable to calculate the transition probability from to . In addition, the initial state distribution of observation is unknown. Therefore, only subsequences starting from the first observation of a year can be directly operated by the Forward-Backward algorithm.

The reason to rearrange an observation subsequence.

The probability of an observation sequence emitted from a model is denoted by . According to the Forward-Backward induction [1,2], we have

|  | (1) |
| --- | --- |

Where

|  | (2) |
| --- | --- |
|  | (3) |

If the class of a sequence does not change in the *n*+1th year compared to the *n*th year, it is assumed that the likelihoods of the subsequence and are close.

|  | (4) |
| --- | --- |

In this study, we make further assumption that the probability of being in state at time *t* in both years are also close, given the observation subsequences:

|  | (5) |
| --- | --- |

It is based on the background knowledge that phenology does not significantly shifted in the study area (no more than 16 days). Using Equations (4) and (5), and the Bayes formula, we get

|  | (6) |
| --- | --- |

As described above, the model likelihood of a subsequence cannot be calculated directly. To cope with this problem, we rearrange into and calculate its likelihood like an annual sequence. By induction we get

|  | (7) |
| --- | --- |

In other words, after the rearrangement, we can calculate and compare the likelihoods of subsequences starting from any time of a year. If the land cover class is persistent, the model likelihood over subsequences should be stable. The above induction is valid for both HMM and HSMM.

References

1. Rabiner, L.R. A tutorial on hidden Markov models and selected applications in speech recognition. *Proc. IEEE* **1989**, *77*, 257–286.

2. Cartella, F.; Lemeire, J.; Dimiccoli, L.; Sahli, H. Hidden Semi-Markov Models for Predictive Maintenance. *Math.* *Probl.* *Eng.* **2015**, *2015*, 1–23.

© 2015 by the authors; licensee MDPI, Basel, Switzerland. This article is an open access article distributed under the terms and conditions of the Creative Commons Attribution license (http://creativecommons.org/licenses/by/4.0/).
